# Supplementary material
Source: Springer Nature journal article supplement (https://www.springermedizin.de/resource/supplementary/12933_2014_913_MOESM3_ESM.pdf/9539172)

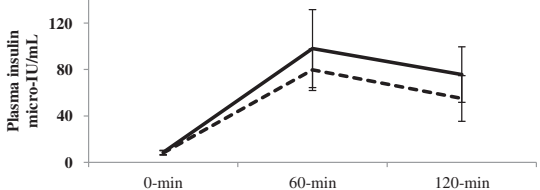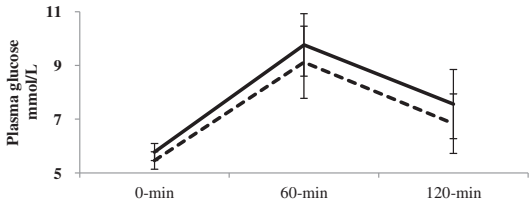

| PG (mmol/L) | $\geq 6.1$ | $> 8.6$ | $\geq 7.8$ |
|-------------|------------|---------|------------|
| Baseline    | 9 / 27     | 18 / 27 | 7 / 25     |
| Final       | 7 / 27     | 14 / 27 | 6 / 25     |

Supplement: MOESM3 [file 9539172]
